# Supplementary material
Source: PubMed Central journal article supplement (PMC3320971)

# Figure S1

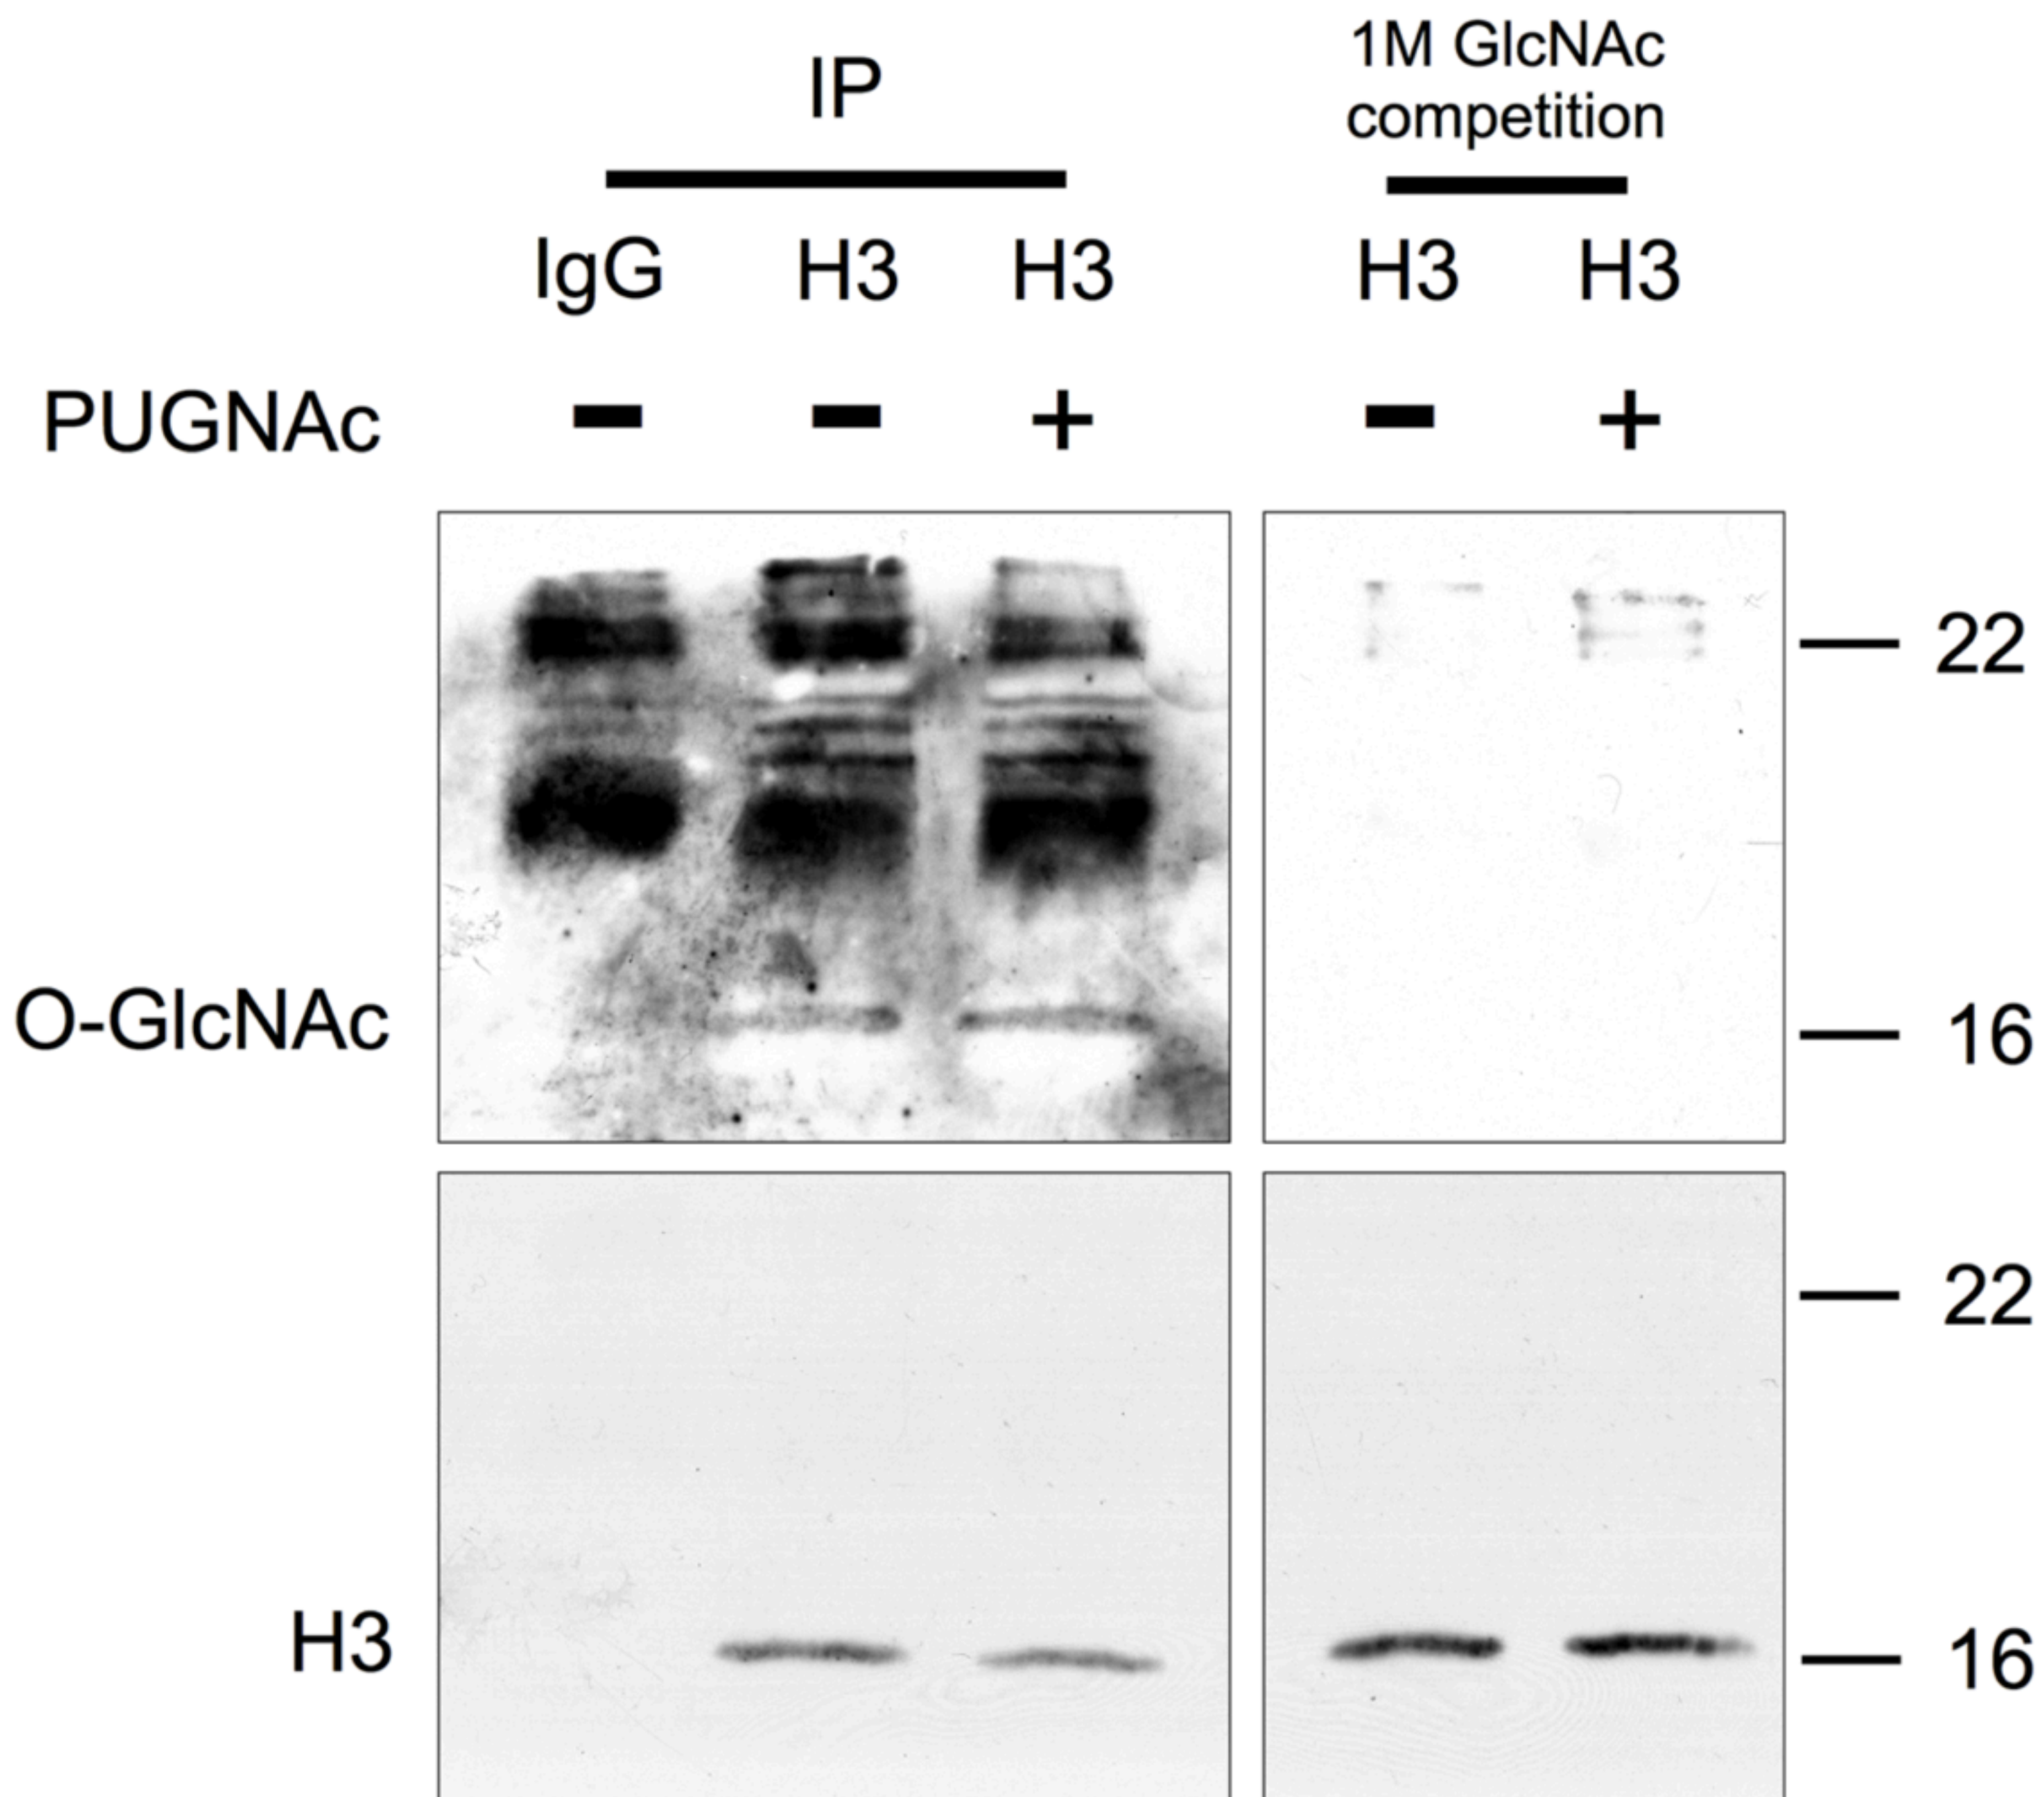

Supplement: supp_M111.315804_jbc.M111.315804-1.pdf [file supp_M111.315804_jbc.M111.315804-1.pdf]

# Figure S2

**A.**

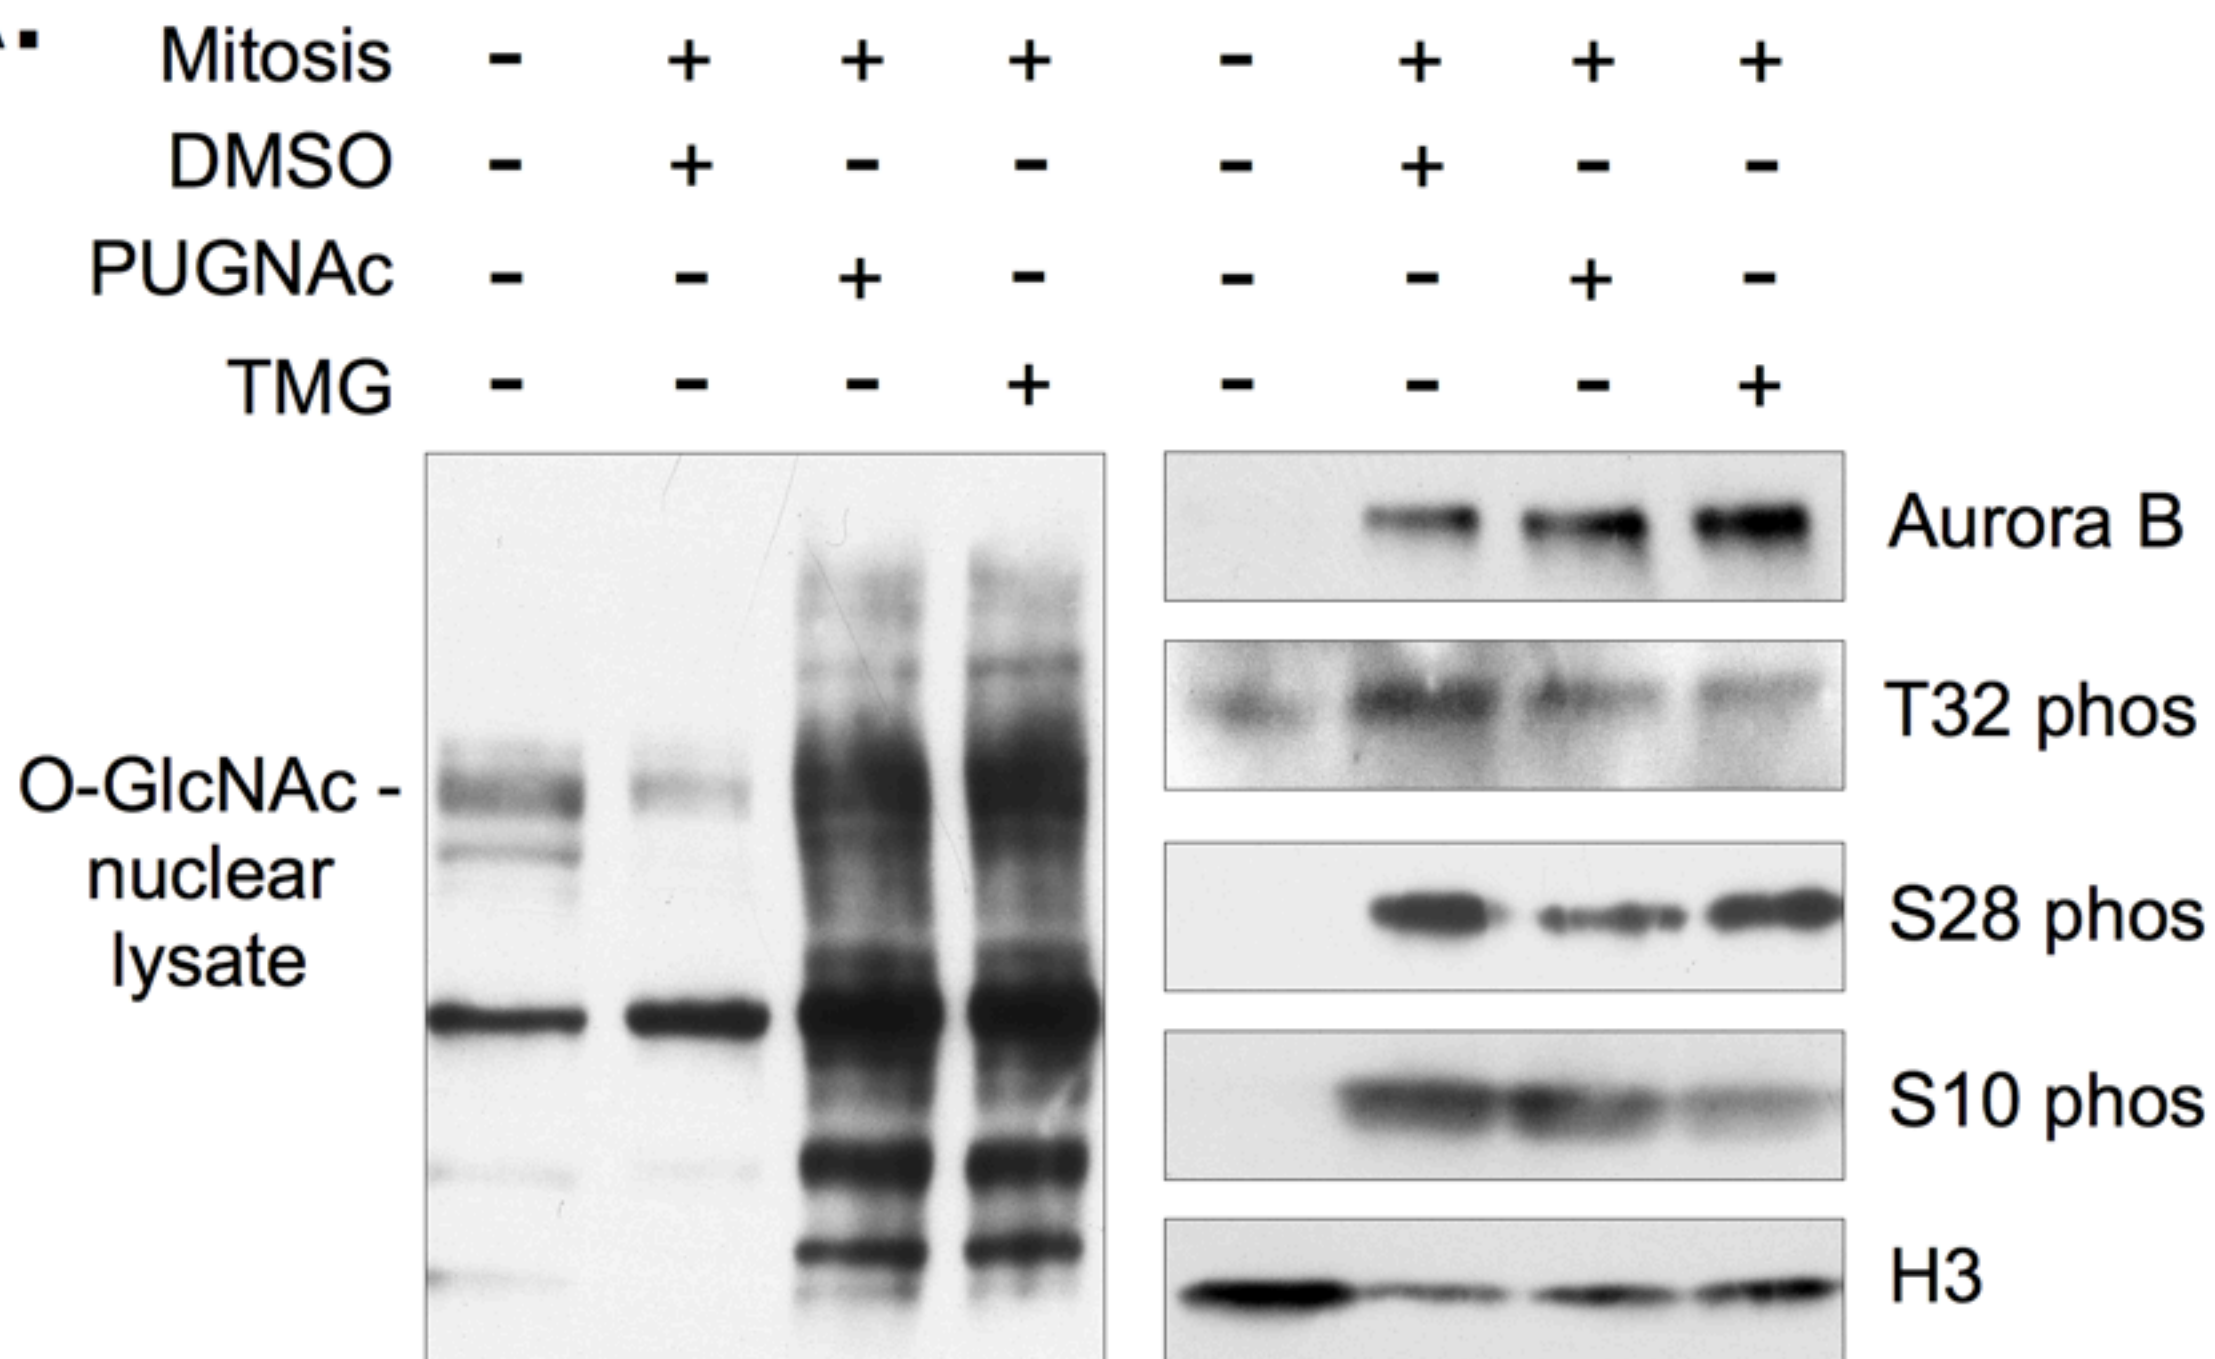

**B.**

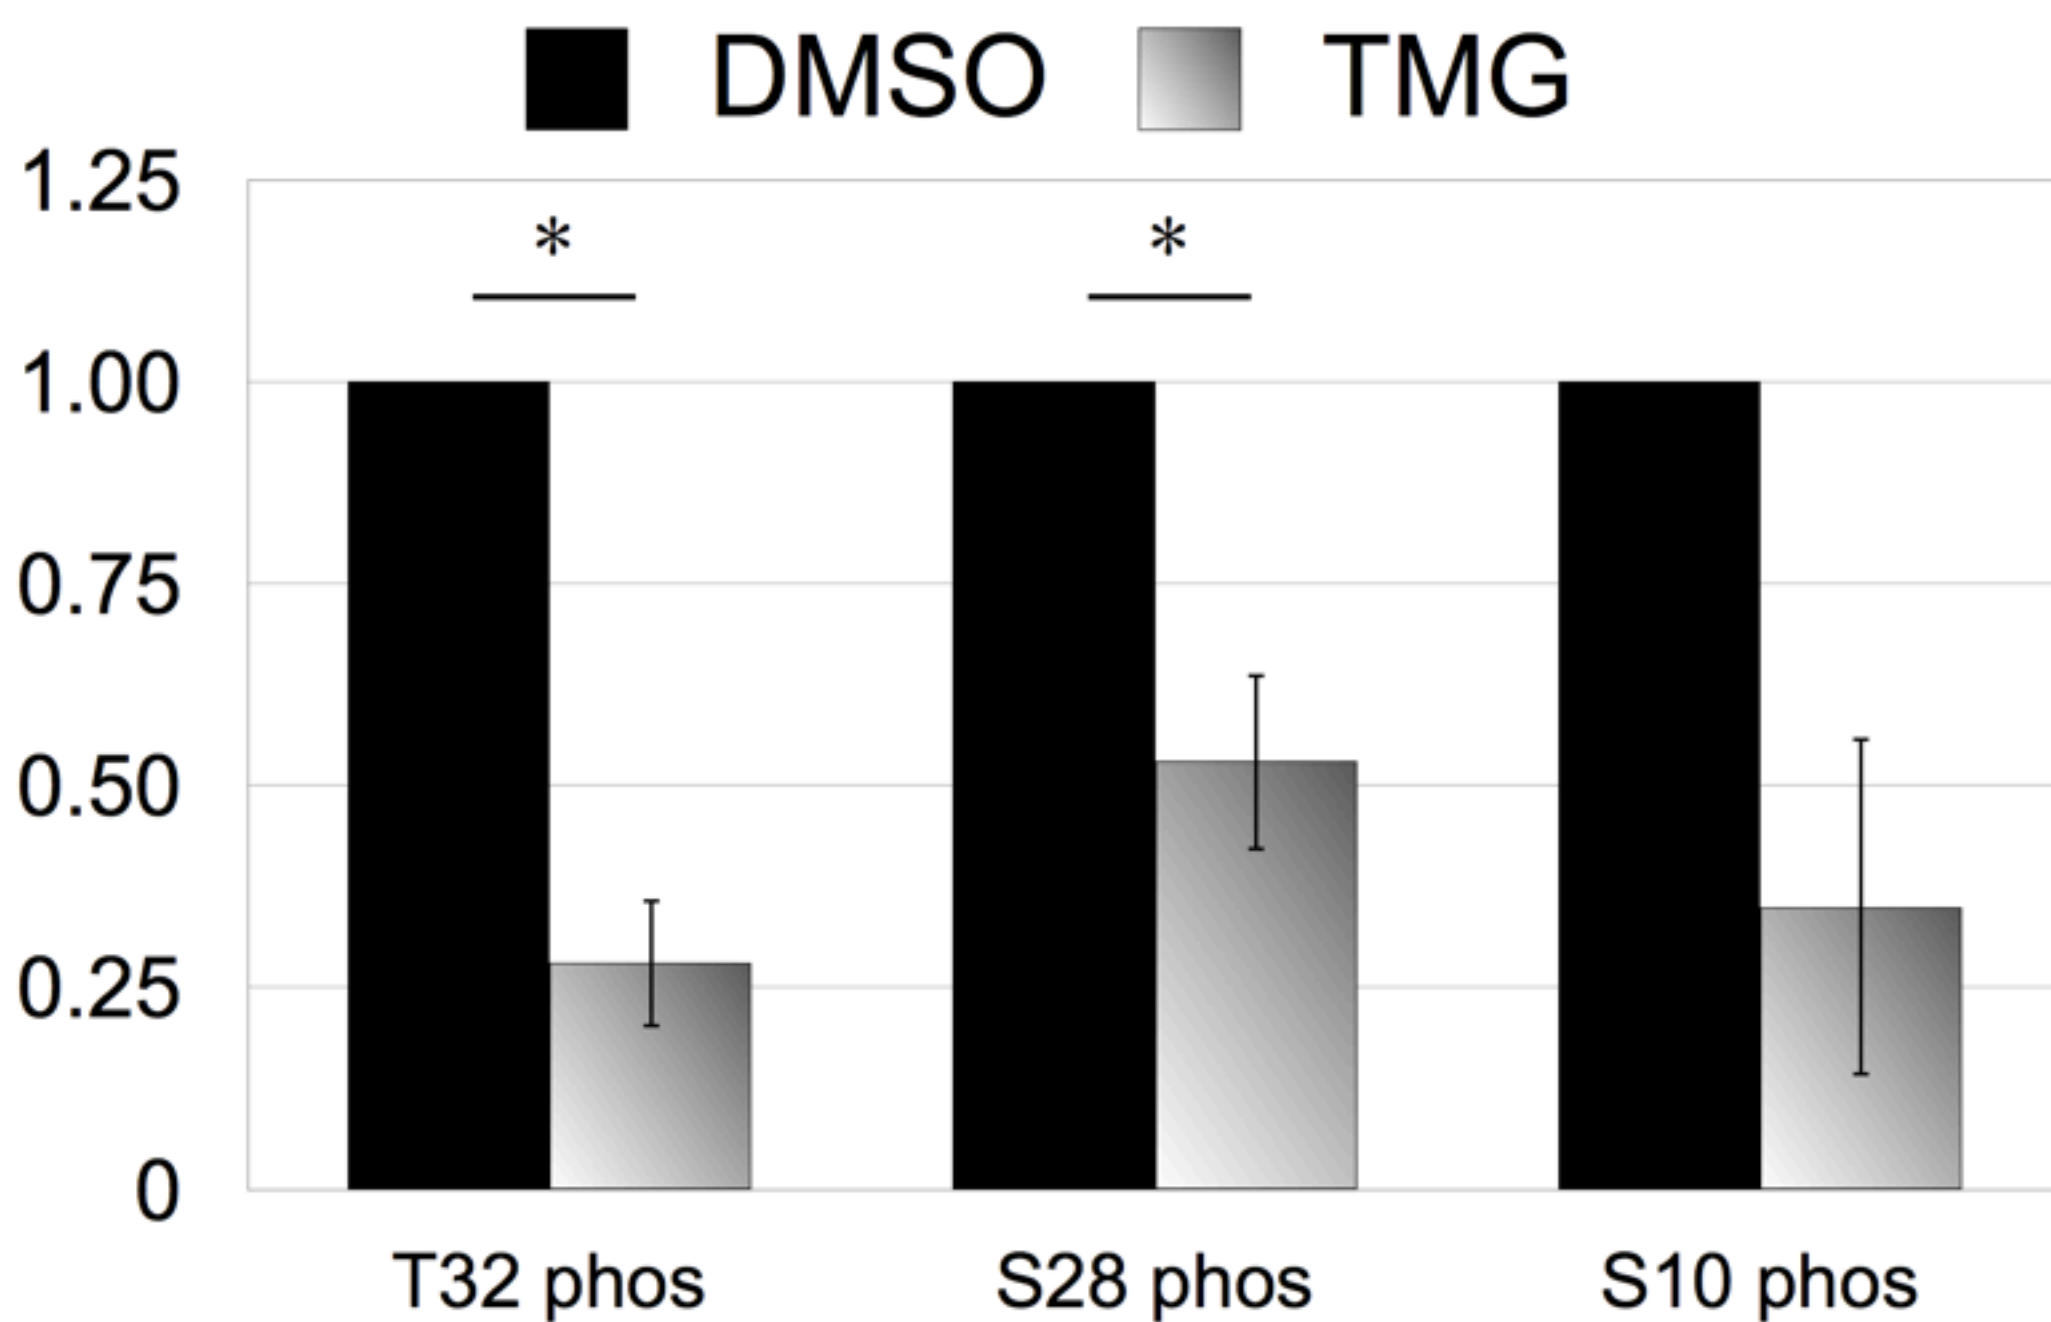

Supplement: supp_M111.315804_jbc.M111.315804-2.pdf [file supp_M111.315804_jbc.M111.315804-2.pdf]
